# Supplementary material for: Metabolic Potential of Microbial Communities in the Hypersaline Sediments of the Bonneville Salt Flats
Source: bioRxiv or medRxiv preprint supplement (doi:10.1101/2021.10.18.464844), 2021-10-19
Supplement: Supplementary file [file media-3.pdf]

**Table S1**

| Sample | Mineralogical Group | Paired Reads | % Reads Mapped | # Contigs | N50   | Max Length (bp) | # Predicted Proteins | # Known Functions | % Unknown Functions |
|--------|---------------------|--------------|----------------|-----------|-------|-----------------|----------------------|-------------------|---------------------|
| D12B.1 | 1                   | 27,028,379   | 73.27          | 480,395   | 1,609 | 152,799         | 772,263              | 221,411           | 71.33               |
| D12B.2 | 2                   | 36,398,584   | 76.72          | 529,453   | 1,867 | 232,657         | 873,020              | 265,247           | 69.62               |
| D67B.1 | 1                   | 36,944,236   | 79.68          | 551,915   | 1,851 | 110,939         | 926,130              | 274,266           | 70.39               |
| D67B.2 | 2                   | 41,065,986   | 71.34          | 718,467   | 1,950 | 248,332         | 1,222,333            | 387,170           | 68.33               |
| D29.1  | 1                   | 27,262,857   | 75.68          | 431,625   | 2,162 | 231,711         | 723,205              | 235,225           | 67.47               |
| D29.2  | 2                   | 31,153,558   | 68.34          | 514,747   | 1,772 | 231,545         | 831,006              | 271,565           | 67.32               |
| D33.1  | 1                   | 31,759,001   | 78.86          | 503,866   | 2,222 | 222,646         | 864,854              | 272,038           | 68.55               |
| D33.2  | 2                   | 30,502,979   | 71.02          | 556,953   | 1,880 | 183,134         | 930,075              | 289,647           | 68.86               |
| D35.1  | 1                   | 53,706,656   | 75.09          | 795,975   | 2,322 | 223,962         | 1,369,835            | 434,454           | 68.28               |
| D35.2  | 3                   | 44,663,651   | 74.56          | 768,295   | 1,461 | 88,995          | 1,212,160            | 325,402           | 73.16               |
| D35.3  | 3                   | 54,664,207   | 70.81          | 1,046,983 | 1,281 | 232,405         | 1,610,078            | 369,933           | 77.02               |
| D56.1  | 1                   | 35,366,014   | 77.89          | 554,687   | 2,239 | 231,467         | 961,743              | 303,059           | 68.49               |
| D56.2  | 3                   | 25,485,574   | 67.47          | 497,380   | 1,467 | 205,540         | 775,528              | 196,824           | 74.62               |
| D56.3  | 3                   | 43,499,921   | 72.23          | 733,529   | 1,982 | 206,649         | 1,236,617            | 394,497           | 68.10               |
| D46.1  | 1                   | 45,073,753   | 77.47          | 802,472   | 1,481 | 521,643         | 1,298,167            | 357,923           | 72.43               |
| D46.2  | 2                   | 32,815,788   | 65.5           | 660,420   | 1,479 | 162,191         | 1,060,402            | 302,249           | 71.50               |

Table S2

| BinSanity Bin Id                          | GTDB-Tk Classify Results                                                                                                       | Bin ID               | Completeness | Contamination | Strain Heterogeneity |
|-------------------------------------------|--------------------------------------------------------------------------------------------------------------------------------|----------------------|--------------|---------------|----------------------|
| BinSanityLC-kmean-bin_57-bin_0-refined_5  | d__Archaea; p__Halobacterota; c__Halobacteria; o__Halobacteriales; f__g__s__                                                   | Halobacteriales.1    | 92           | 5.46          | 35.29                |
| BinSanityLC-kmean-bin_45-bin_0-refined_15 | d__Archaea; p__Halobacterota; c__Halobacteria; o__Halobacteriales; f__g__s__                                                   | Halobacteriales.2    | 62           | 6.07          | 40.74                |
| BinSanityLC-kmean-bin_57-bin_0-refined_8  | d__Archaea; p__Halobacterota; c__Halobacteria; o__Halobacteriales; f__g__s__                                                   | Halobacteriales.3    | 47           | 0             | 0                    |
| BinSanityLC-kmean-bin_35-bin_0-refined_4  | d__Archaea; p__Halobacterota; c__Halobacteria; o__Halobacteriales; f__Haloarculaceae; g__s__                                   | Haloarculaceae.1     | 90           | 13.91         | 15.79                |
| BinSanityLC-kmean-bin_36-bin_0-refined_3  | d__Archaea; p__Halobacterota; c__Halobacteria; o__Halobacteriales; f__Haloarculaceae; g__s__                                   | Haloarculaceae.2     | 71           | 11.17         | 13.95                |
| BinSanityLC-kmean-bin_44-bin_0-refined_5  | d__Archaea; p__Halobacterota; c__Halobacteria; o__Halobacteriales; f__Haloarculaceae; g__s__                                   | Haloarculaceae.3     | 67           | 6.81          | 25                   |
| BinSanityLC-kmean-bin_61-bin_0-refined_12 | d__Archaea; p__Halobacterota; c__Halobacteria; o__Halobacteriales; f__Haloarculaceae; g__Halovenus; s__                        | Halovenus            | 67           | 8.27          | 46.43                |
| BinSanityLC-kmean-bin_53-bin_0-refined_1  | d__Archaea; p__Halobacterota; c__Halobacteria; o__Halobacteriales; f__Haloarculaceae; g__QS-1-69-70; s__                       | Haloarculaceae.4     | 87           | 3.97          | 18.18                |
| BinSanityLC-kmean-bin_18-bin_0-refined_0  | d__Archaea; p__Halobacterota; c__Halobacteria; o__Halobacteriales; f__Haloarculaceae; g__SW-9-67-25; s__                       | Haloarculaceae.5     | 90           | 5.48          | 52.38                |
| BinSanityLC-kmean-bin_53-bin_0-refined_2  | d__Archaea; p__Halobacterota; c__Halobacteria; o__Halobacteriales; f__Haloferacaceae; g__s__                                   | Haloferacaceae.1     | 80           | 2.31          | 60                   |
| BinSanityLC-kmean-bin_45-bin_0-refined_6  | d__Archaea; p__Halobacterota; c__Halobacteria; o__Halobacteriales; f__Haloferacaceae; g__s__                                   | Haloferacaceae.2     | 49           | 0.38          | 0                    |
| BinSanityLC-kmean-bin_45-bin_0-refined_10 | d__Archaea; p__Halobacterota; c__Halobacteria; o__Halobacteriales; f__Haloferacaceae; g__s__                                   | Haloferacaceae.3     | 48           | 1.2           | 0                    |
| BinSanityLC-kmean-bin_14-bin_0-refined_8  | d__Archaea; p__Halobacterota; c__Methanosarcinia; o__Methanosarcinales; f__Methanosarcinaceae; g__Methanohalobium; s__         | Methanohalobium      | 99           | 0.65          | 0                    |
| BinSanityLC-kmean-bin_57-bin_0-refined_3  | d__Archaea; p__Nanohaloarchaeota; c__Nanosalinia; o__Nanosalinales; f__g__s__                                                  | Nanosalinales        | 56           | 0.93          | 0                    |
| BinSanityLC-kmean-bin_14-bin_0-refined_6  | d__Archaea; p__Thermoplasmatota; c__o__f__g__s__                                                                               | Thermoplasmatota.1   | 52           | 1.6           | 0                    |
| BinSanityLC-kmean-bin_14-bin_0-refined_12 | d__Archaea; p__Thermoplasmatota; c__SW-10-69-26; o__f__g__s__                                                                  | Thermoplasmatota.2   | 57           | 0.8           | 0                    |
| BinSanityLC-kmean-bin_44-bin_0-refined_1  | d__Bacteria; p__Bacteroidota; c__Bacteroidia; o__Bacteroidales; f__UBA12077; g__s__                                            | Bacteroidales        | 76           | 8.46          | 48                   |
| BinSanityLC-kmean-bin_57-bin_0-refined_4  | d__Bacteria; p__Bacteroidota; c__Bacteroidia; o__Flavobacteriales; f__PHOS-HE28; g__s__                                        | Flavobacteriales     | 58           | 5.25          | 88.24                |
| BinSanityLC-kmean-bin_85-bin_0            | d__Bacteria; p__Bacteroidota; c__Rhodothermia; o__Rhodothermales; f__Salinibacteraceae; g__Salinivenerus; s__                  | Salinivenerus        | 96           | 4.55          | 15.79                |
| BinSanityLC-kmean-bin_28-bin_0-refined_2  | d__Bacteria; p__Bipolaricaulota; c__Bipolaricaulia; o__RBG-16-55-9; f__RBG-16-55-9; g__s__                                     | Bipolaricaulia       | 83           | 11.76         | 100                  |
| BinSanityLC-kmean-bin_24-bin_0-refined_1  | d__Bacteria; p__Cyanobacteria; c__Cyanobacteriia; o__Cyanobacteriales; f__Rubridibacteraceae; g__Halotheca; s__                | Halotheca            | 87           | 2.9           | 83.33                |
| BinSanityLC-kmean-bin_44-bin_0-refined_9  | d__Bacteria; p__Firmicutes; c__Halanaerobiia; o__Halanaerobiales; f__g__s__                                                    | Halanaerobiales      | 64           | 3.02          | 0                    |
| BinSanityLC-kmean-bin_13-bin_0-refined_3  | d__Bacteria; p__Myxococcota; c__Bradymonadia; o__Bradymonadales; f__Bradymonadaceae; g__s__                                    | Bradymonadaceae      | 53           | 1.94          | 0                    |
| BinSanityLC-kmean-bin_24-bin_0-refined_5  | d__Bacteria; p__Patescibacteria; c__Paceibacteria; o__SW-4-49-11; f__SW-4-49-11; g__SW-4-49-11; s__                            | Paceibacteria        | 80           | 2.59          | 100                  |
| BinSanityLC-kmean-bin_73-bin_0-refined_4  | d__Bacteria; p__Proteobacteria; c__Alphaproteobacteria; o__UBA6615; f__g__s__                                                  | Alphaproteobacteria  | 47           | 1.3           | 100                  |
| BinSanityLC-kmean-bin_55-bin_0-refined_6  | d__Bacteria; p__Proteobacteria; c__Gammaproteobacteria; o__Thiohalorhabdadales; f__Thiohalorhabdaceae; g__Thiohalorhabdus; s__ | Thiohalorhabdaceae.1 | 80           | 0.89          | 0                    |
| BinSanityLC-kmean-bin_92-bin_0-refined_3  | d__Bacteria; p__Proteobacteria; c__Gammaproteobacteria; o__Thiohalorhabdadales; f__Thiohalorhabdaceae; g__Thiohalorhabdus; s__ | Thiohalorhabdaceae.2 | 59           | 3.41          | 66.67                |
| BinSanityLC-kmean-bin_92-bin_0-refined_6  | d__Bacteria; p__Verrucomicrobiota; c__Verrucomicrobiae; o__Pedosphaerales; f__AV2; g__s__                                      | Pedosphaerales       | 74           | 3.38          | 0                    |

\*Completeness, Contamination, and Strain Heterogeneity Determined by CheckM

[illegible]

|        |                   |                                                                            |                         |             |             |             |             |             |             |             |              |             |             |             |             |             |             |             |             |
|--------|-------------------|----------------------------------------------------------------------------|-------------------------|-------------|-------------|-------------|-------------|-------------|-------------|-------------|--------------|-------------|-------------|-------------|-------------|-------------|-------------|-------------|-------------|
| 430316 | dmgD_ynf          | 2-hydroxy-4-methyl-2-oxobutanoate semialdehyde hydrolase                   | Hydrocarbon Degratation | 2.76624186  | 0.272967201 | 0.875100002 | 0.590989816 | 0.000205647 | 0.542811789 | 0.038630056 | 2.313260334  | 2.801629262 | 2.835738274 | 0.044388926 | 3.274872235 | 0.744604685 | 0.446274821 | 0.68184137  | 0.709384652 |
| 430317 | dhac_ynf_ynfB     | 2-hydroxy-4-methyl-2-oxobutanoate 2-oxopropionyl dehydrogenase             | Hydrocarbon Degratation | 0.360128221 | 0.232937955 | 2.509044495 | 0.339353423 | 0           | 0.379477913 | 0.13652107  | 15.05740568  | 2.84692961  | 20.37123326 | 56.3475783  | 70.16239336 | 184.3121374 | 10.46576505 | 0.962362495 | 0.97330645  |
| 430322 | dhfrB_dhfr        | acetylcholine hydrolase 3-carbon thioester, acetylcholine diacylhydrazide  | Hydrocarbon Degratation | 0           | 0           | 0           | 2.01243609  | 0.00017584  | 0           | 0           | 0            | 0           | 0           | 0           | 0           | 0           | 0           | 0           | 0           |
| 431311 | dhc               | anthranilate 1,2-disoxygenase reductase component                          | Hydrocarbon Degratation | 0           | 0           | 0           | 0.285237637 | 0           | 0           | 0           | 0            | 0           | 0           | 0           | 0           | 0           | 0           | 0           | 0           |
| 434578 | dhbA_dhbA_dhbB    | naphthalene 1,2-disoxygenase ferredoxin component                          | Hydrocarbon Degratation | 0           | 0.114489078 | 0           | 0           | 0           | 0.183866149 | 0           | 0            | 0.011211808 | 0.74532787  | 0           | 0           | 0           | 0           | 0           | 0           |
| 434581 | dhbA_dhbA_dhbB    | naphthalene 1,2-disoxygenase ferredoxin reductase component                | Hydrocarbon Degratation | 0.05939440  | 0.087546817 | 0           | 0           | 0           | 0.087283018 | 0           | 0            | 0.59668967  | 0           | 0.877126509 | 0           | 0           | 0           | 0           | 0           |
| 434584 | dhbD              | 2-hydroxy-3-methyl-2-oxobutanoate hydrolase                                | Hydrocarbon Degratation | 0           | 0           | 0           | 0           | 0           | 0           | 0           | 0            | 0           | 0           | 0           | 0           | 0           | 0           | 0           | 0           |
| 434585 | dhbD              | trans-4-hydroxy-2-oxobutanoate hydrolase                                   | Hydrocarbon Degratation | 0           | 0           | 0           | 0           | 0           | 0           | 0           | 0            | 0           | 0           | 0           | 0           | 0           | 0           | 0           | 0           |
| 431727 | dhc               | 3-oxoadipate semialdehyde 4-carboxy-2-oxopentanoate decarboxylase          | Hydrocarbon Degratation | 0           | 0.03015508  | 0.972380007 | 0.717311316 | 0           | 0.679137389 | 0.181850485 | 0            | 0.709244909 | 0           | 0.153177247 | 0.72987265  | 0           | 0.337163237 | 0           | 0           |
| 431750 | dhbA_dhbA2_dhbB   | hydroxy 1,3-disoxygenase subunit beta                                      | Hydrocarbon Degratation | 0           | 0           | 0.202125387 | 0           | 0           | 0           | 0           | 0            | 0           | 0           | 0           | 0           | 0           | 0           | 0           | 0           |
| 431756 | dhc               | 2-hydroxy-5-oxo-6-(4'-oxophenyl)-2,4-thiazole hydrolase                    | Hydrocarbon Degratation | 0           | 0.406879908 | 0           | 0           | 0           | 0           | 0           | 0            | 0           | 0           | 0           | 0           | 0           | 0           | 0           | 0           |
| 431761 | dhcD_thuA_thuB    | toluene monooxygenase system protein A                                     | Hydrocarbon Degratation | 0           | 0           | 0           | 0           | 0           | 0           | 0           | 0.045446832  | 0           | 0           | 0           | 0           | 0           | 0           | 0           | 0           |
| 431762 | dhcD_thuA_thuB    | toluene monooxygenase system protein B                                     | Hydrocarbon Degratation | 0           | 0           | 0           | 0           | 0           | 0           | 0           | 0            | 0           | 0           | 0           | 0           | 0           | 0           | 0           | 0           |
| 431763 | dhcD_thuA_thuB    | toluene monooxygenase system protein D                                     | Hydrocarbon Degratation | 0           | 0           | 0           | 0           | 0           | 0           | 0           | 0            | 0           | 0           | 0           | 0           | 0           | 0           | 0           | 0           |
| 431764 | dhcD_thuA_thuB    | toluene monooxygenase system protein E                                     | Hydrocarbon Degratation | 0           | 0           | 0           | 0           | 0           | 0           | 0           | 0            | 0           | 0           | 0           | 0           | 0           | 0           | 0           | 0           |
| 431246 | dhcD_dhcF_thuA5   | phenyltoluene 2-monooxygenase (PAHs) P450                                  | Hydrocarbon Degratation | 0           | 0           | 0           | 0           | 0           | 0           | 0           | 0            | 0           | 0           | 0.212648701 | 0.021950596 | 0           | 0.142360595 | 0           | 0.048601515 |
| 431248 | dhcA2_dhcA2_thuA4 | hydroxymethylphenylmethane dicarboxylate subunit beta                      | Hydrocarbon Degratation | 0           | 0           | 0           | 0           | 0           | 0           | 0           | 0            | 0           | 0           | 0.212648701 | 0           | 0.345437748 | 0           | 0           | 0           |
| 431249 | dhcA2_thuA        | cis-1,2-dihydrobenzene 1,2-diol/dihydrobenzene chlorohydrate dehydrogenase | Hydrocarbon Degratation | 0           | 0           | 0           | 0           | 0           | 0           | 0           | 0            | 0           | 0           | 0           | 0           | 0           | 0           | 0           | 0           |
| 431087 | dhbA_dhbA3_dhbF   | hydroxy 2,3-disoxygenase ferredoxin component                              | Hydrocarbon Degratation | 0           | 0           | 0           | 0           | 0           | 0           | 0           | 0            | 0           | 0           | 0           | 0           | 0           | 0           | 0           | 0           |
| 431248 | dhcA              | anthranilate 1,2-disoxygenase ferredoxin component                         | Hydrocarbon Degratation | 0           | 0.179334913 | 0           | 0           | 0           | 0           | 0           | 0            | 0.11452369  | 0           | 0           | 0.257502919 | 0           | 0.177592639 | 0           | 0           |
| 431249 | dhcA              | anthranilate 1,2-disoxygenase ferredoxin reductase component               | Hydrocarbon Degratation | 0           | 2.542317287 | 0           | 0           | 0           | 0           | 0           | 0            | 0.670088867 | 0           | 0           | 0           | 0           | 0           | 0           | 0           |
| 431364 | dhcA_ynf_ynfB     | 2-oxopent-4-enal:nicotinamide 2-oxopent-4-enal hydrolase                   | Hydrocarbon Degratation | 0           | 0           | 0           | 0           | 0           | 0           | 0           | 0            | 0.057205981 | 0           | 0           | 0           | 0           | 0           | 0           | 0           |
| 431385 | dhbA              | 6-hydroxy-2-oxocyclohexanone dehydrogenase subunit alpha                   | Hydrocarbon Degratation | 0           | 0           | 0           | 0           | 0           | 0           | 0.338495203 | 0            | 0           | 0           | 0           | 0           | 0           | 0           | 0           | 0           |
| 431385 | dhbB              | 6-hydroxy-2-oxocyclohexanone dehydrogenase subunit beta                    | Hydrocarbon Degratation | 0           | 0           | 0           | 0           | 0           | 0           | 0           | 0            | 0           | 0           | 0           | 0           | 0           | 0           | 0           | 0           |
| 431387 | dhbA              | 6-hydroxy-2-oxocyclohexanone dehydrogenase subunit gamma                   | Hydrocarbon Degratation | 0           | 0           | 0           | 0           | 0           | 0           | 0           | 0            | 0           | 0           | 0           | 0           | 0           | 0           | 0           | 0           |
| 431515 | dhbB              | benzoyl-CoA reductase subunit BdhB                                         | Hydrocarbon Degratation | 0           | 0           | 0           | 0           | 0           | 0           | 0           | 0            | 0           | 0           | 0           | 0           | 0           | 0           | 0           | 0           |
| 431516 | dhbC              | benzoyl-CoA reductase subunit BdhC                                         | Hydrocarbon Degratation | 0           | 0           | 0           | 0.142490012 | 0           | 0           | 0           | 0.0432107723 | 0           | 0           | 0           | 0           | 0           | 0           | 0           | 2.781166452 |
| 431811 | dhbA              | nicotinic dehydrogenase subunit A                                          | Hydrocarbon Degratation | 0           | 0           | 0           | 0           | 0           | 0           | 0           | 0.0421594231 | 0           | 0           | 0           | 0           | 0           | 0           | 0           | 0           |
| 431812 | dhbB              | nicotinic dehydrogenase subunit B                                          | Hydrocarbon Degratation | 0           | 0           | 0           | 0           | 0           | 0           | 0           | 0            | 0           | 0           | 0.701420319 | 0           | 0           | 0           | 0           | 0           |
| 431820 | dhbC              | nicotinic dehydrogenase subunit C                                          | Hydrocarbon Degratation | 0           | 0           | 0           | 0           | 0           | 0           | 0           | 0            | 0           | 0           | 0           | 0           | 0           | 0           | 0           | 0           |
| 431555 | dhc               | 4-methylumbelliferone oxidase (methylamine-forming)                        | Hydrocarbon Degratation | 0           | 0           | 0           | 0           | 0           | 0           | 0           | 0            | 0           | 0           | 0           | 0           | 0           | 0           | 0           | 0           |
| 430170 | dhcA1             | nicotinic dehydrogenase                                                    | Hydrocarbon Degratation | 2.058145354 | 0           | 0           | 0           | 0           | 0           | 0           | 0            | 0           | 0           | 0           | 0           | 0           | 0           | 0           | 0           |

\*Values represent transcripts per million (TPM)

**Table S4**

| <b>Bin ID</b>     | <b>Operon Order on Contigs</b> | <b>Form</b>               |
|-------------------|--------------------------------|---------------------------|
| Halobacteriales.2 | coxSL, coxLM                   | Infer form II             |
| Halobacteriales.3 | none                           | form II or mis-annotated  |
| Haloarculaceae.1  | coxLM                          | form II                   |
| Haloarculaceae.2  | coxGSL, coxMS, coxLM           | Infer both                |
| Haloarculaceae.5  | coxSLM, coxMSL, coxGMSL        | form I, form II           |
| Halanerobiales    | coxMS, coxMSMS, coxMS, coxMS   | Infer form I missing coxL |

**Table S5**

| Query             | Reference         | ANI Estimate | Matches | Total |
|-------------------|-------------------|--------------|---------|-------|
| PCN9.gz_assembly  | Haloferacaceae.3  | 75.5033      | 51      | 981   |
| Haloferacaceae.2  | Haloarculaceae.1  | 75.5864      | 54      | 416   |
| Haloarculaceae.4  | Halovenus         | 75.5912      | 76      | 678   |
| WSH3.gz_assembly  | Haloferacaceae.2  | 75.6237      | 81      | 1077  |
| Haloferacaceae.2  | WSH3.gz_assembly  | 75.6309      | 59      | 416   |
| WSH3.gz_assembly  | Haloferacaceae.3  | 75.6391      | 51      | 1077  |
| Haloarculaceae.3  | Haloferacaceae.1  | 75.6425      | 52      | 604   |
| Haloferacaceae.1  | Haloarculaceae.3  | 75.6458      | 54      | 713   |
| Halovenus         | WSA2.gz_assembly  | 75.6842      | 58      | 605   |
| Haloferacaceae.3  | Haloarculaceae.4  | 75.6976      | 57      | 347   |
| Haloarculaceae.4  | Haloferacaceae.3  | 75.7592      | 57      | 678   |
| Haloarculaceae.1  | Haloferacaceae.1  | 75.7632      | 92      | 953   |
| Halovenus         | Haloarculaceae.2  | 75.7656      | 56      | 605   |
| Haloarculaceae.2  | Halobacteriales.2 | 75.7952      | 66      | 663   |
| Halobacteriales.2 | Haloarculaceae.2  | 75.8023      | 68      | 686   |
| Haloarculaceae.2  | Halovenus         | 75.8058      | 61      | 663   |
| Halobacteriales.2 | Haloarculaceae.1  | 75.8343      | 65      | 686   |
| WSA2.gz_assembly  | Haloarculaceae.3  | 75.8417      | 118     | 1248  |
| Haloarculaceae.3  | WSA2.gz_assembly  | 75.8542      | 121     | 604   |
| Haloarculaceae.1  | Halobacteriales.2 | 75.8638      | 64      | 953   |
| WSA2.gz_assembly  | Halovenus         | 75.8747      | 67      | 1248  |
| Haloarculaceae.5  | Halobacteriales.2 | 75.8963      | 77      | 824   |
| Halovenus         | Haloarculaceae.4  | 75.9099      | 64      | 605   |
| Haloferacaceae.3  | WSA2.gz_assembly  | 75.9147      | 84      | 347   |
| WSA2.gz_assembly  | Haloferacaceae.3  | 75.9204      | 93      | 1248  |
| PCN9.gz_assembly  | Halovenus         | 75.9496      | 75      | 981   |
| Halobacteriales.2 | Haloarculaceae.5  | 75.9543      | 87      | 686   |
| WSA2.gz_assembly  | Halobacteriales.2 | 75.9709      | 104     | 1248  |
| Haloferacaceae.2  | Haloarculaceae.5  | 75.9789      | 57      | 416   |
| Haloarculaceae.1  | Haloferacaceae.2  | 75.9804      | 54      | 953   |
| Halobacteriales.2 | Haloferacaceae.1  | 75.9858      | 60      | 686   |
| PCN9.gz_assembly  | Halobacteriales.2 | 75.996       | 70      | 981   |
| Haloferacaceae.2  | Haloarculaceae.4  | 76.0114      | 57      | 416   |
| Halobacteriales.2 | Haloarculaceae.4  | 76.0409      | 81      | 686   |

|                   |                   |         |     |      |
|-------------------|-------------------|---------|-----|------|
| Haloferacaceae.1  | Halobacteriales.2 | 76.0496 | 53  | 713  |
| Haloarculaceae.4  | Halobacteriales.2 | 76.0591 | 70  | 678  |
| Halobacteriales.2 | PCN9.gz_assembly  | 76.067  | 58  | 686  |
| Halobacteriales.2 | WSA2.gz_assembly  | 76.0745 | 101 | 686  |
| Haloarculaceae.4  | Haloferacaceae.2  | 76.1068 | 60  | 678  |
| Haloarculaceae.3  | Haloarculaceae.4  | 76.1343 | 124 | 604  |
| PCN9.gz_assembly  | Haloarculaceae.3  | 76.1655 | 107 | 981  |
| PCN9.gz_assembly  | Haloarculaceae.2  | 76.2202 | 157 | 981  |
| Haloarculaceae.2  | Haloferacaceae.1  | 76.2264 | 100 | 663  |
| Haloarculaceae.5  | Haloferacaceae.2  | 76.2338 | 55  | 824  |
| Haloarculaceae.2  | PCN9.gz_assembly  | 76.2443 | 159 | 663  |
| Haloferacaceae.1  | Haloarculaceae.1  | 76.2665 | 95  | 713  |
| WSH3.gz_assembly  | Halobacteriales.2 | 76.2729 | 94  | 1077 |
| Haloferacaceae.1  | Haloarculaceae.2  | 76.2759 | 94  | 713  |
| PCN9.gz_assembly  | Haloferacaceae.1  | 76.276  | 164 | 981  |
| Halovenus         | PCN9.gz_assembly  | 76.3011 | 66  | 605  |
| Haloarculaceae.3  | PCN9.gz_assembly  | 76.3024 | 103 | 604  |
| Haloarculaceae.4  | Haloarculaceae.3  | 76.3097 | 119 | 678  |
| PCN9.gz_assembly  | Haloferacaceae.2  | 76.3385 | 78  | 981  |
| Haloarculaceae.2  | WSA2.gz_assembly  | 76.3494 | 195 | 663  |
| Halovenus         | Haloarculaceae.5  | 76.3631 | 89  | 605  |
| Halobacteriales.2 | WSH3.gz_assembly  | 76.3671 | 83  | 686  |
| Haloarculaceae.5  | Halovenus         | 76.3789 | 92  | 824  |
| WSA2.gz_assembly  | Haloarculaceae.2  | 76.4137 | 209 | 1248 |
| Haloarculaceae.5  | Haloferacaceae.1  | 76.4297 | 99  | 824  |
| Haloferacaceae.2  | PCN9.gz_assembly  | 76.4777 | 61  | 416  |
| Haloferacaceae.1  | PCN9.gz_assembly  | 76.5038 | 147 | 713  |
| PCN9.gz_assembly  | Haloarculaceae.1  | 76.5093 | 226 | 981  |
| Halovenus         | Haloarculaceae.1  | 76.5207 | 76  | 605  |
| Haloferacaceae.1  | Haloarculaceae.5  | 76.5286 | 91  | 713  |
| Haloferacaceae.1  | WSH3.gz_assembly  | 76.5404 | 121 | 713  |
| WSH3.gz_assembly  | Haloferacaceae.1  | 76.5728 | 136 | 1077 |
| WSH3.gz_assembly  | Haloarculaceae.2  | 76.5878 | 217 | 1077 |
| Haloarculaceae.3  | Haloarculaceae.2  | 76.6097 | 124 | 604  |
| Haloarculaceae.2  | Haloarculaceae.3  | 76.6156 | 108 | 663  |
| Haloferacaceae.1  | Haloarculaceae.4  | 76.623  | 182 | 713  |

|                  |                  |         |     |      |
|------------------|------------------|---------|-----|------|
| Haloarculaceae.1 | PCN9.gz_assembly | 76.6728 | 220 | 953  |
| PCN9.gz_assembly | WSH3.gz_assembly | 76.688  | 189 | 981  |
| Haloarculaceae.4 | Haloferacaceae.1 | 76.6991 | 166 | 678  |
| Haloarculaceae.1 | WSA2.gz_assembly | 76.7738 | 235 | 953  |
| Haloarculaceae.2 | WSH3.gz_assembly | 76.7878 | 201 | 663  |
| WSA2.gz_assembly | Haloarculaceae.1 | 76.8051 | 263 | 1248 |
| Haloarculaceae.1 | Haloarculaceae.3 | 76.8539 | 153 | 953  |
| WSA2.gz_assembly | Haloarculaceae.5 | 76.8577 | 265 | 1248 |
| WSH3.gz_assembly | PCN9.gz_assembly | 76.8622 | 178 | 1077 |
| Haloarculaceae.1 | Halovenus        | 76.8764 | 81  | 953  |
| PCN9.gz_assembly | Haloarculaceae.5 | 76.9259 | 233 | 981  |
| Haloarculaceae.3 | Haloarculaceae.1 | 76.9321 | 154 | 604  |
| PCN9.gz_assembly | Haloarculaceae.4 | 76.9435 | 259 | 981  |
| Haloferacaceae.2 | WSA2.gz_assembly | 76.9708 | 128 | 416  |
| Haloferacaceae.1 | Haloferacaceae.3 | 76.9895 | 96  | 713  |
| Haloarculaceae.4 | PCN9.gz_assembly | 76.9934 | 249 | 678  |
| Haloarculaceae.2 | Haloarculaceae.4 | 77.0054 | 206 | 663  |
| WSA2.gz_assembly | WSH3.gz_assembly | 77.0281 | 287 | 1248 |
| Haloarculaceae.5 | WSA2.gz_assembly | 77.0404 | 254 | 824  |
| Haloarculaceae.4 | Haloarculaceae.2 | 77.0858 | 218 | 678  |
| WSA2.gz_assembly | Haloferacaceae.2 | 77.0998 | 144 | 1248 |
| WSH3.gz_assembly | WSA2.gz_assembly | 77.1226 | 281 | 1077 |
| Haloarculaceae.4 | Haloarculaceae.1 | 77.151  | 233 | 678  |
| WSH3.gz_assembly | Haloarculaceae.4 | 77.1535 | 256 | 1077 |
| Haloarculaceae.1 | Haloarculaceae.4 | 77.2056 | 233 | 953  |
| Haloarculaceae.4 | WSH3.gz_assembly | 77.2218 | 234 | 678  |
| Haloferacaceae.3 | Haloferacaceae.1 | 77.2904 | 98  | 347  |
| WSH3.gz_assembly | Haloarculaceae.3 | 77.3682 | 184 | 1077 |
| Haloarculaceae.1 | Haloarculaceae.2 | 77.374  | 175 | 953  |
| WSA2.gz_assembly | Haloferacaceae.1 | 77.3798 | 299 | 1248 |
| Haloarculaceae.2 | Haloarculaceae.1 | 77.4171 | 173 | 663  |
| Haloarculaceae.5 | PCN9.gz_assembly | 77.4383 | 202 | 824  |
| Haloarculaceae.3 | WSH3.gz_assembly | 77.4672 | 175 | 604  |
| Haloferacaceae.1 | WSA2.gz_assembly | 77.4823 | 282 | 713  |
| Haloarculaceae.5 | Haloarculaceae.3 | 77.5149 | 163 | 824  |
| WSA2.gz_assembly | Haloarculaceae.4 | 77.5401 | 334 | 1248 |



|                  |                  |         |     |      |
|------------------|------------------|---------|-----|------|
| Haloarculaceae.4 | WSA2.gz_assembly | 77.5402 | 325 | 678  |
| WSH3.gz_assembly | Haloarculaceae.1 | 77.6034 | 272 | 1077 |
| WSH3.gz_assembly | Haloarculaceae.5 | 77.654  | 273 | 1077 |
| Haloarculaceae.4 | Haloarculaceae.5 | 77.6572 | 243 | 678  |
| Haloarculaceae.5 | Haloarculaceae.4 | 77.6658 | 245 | 824  |
| Haloarculaceae.3 | Haloarculaceae.5 | 77.6723 | 164 | 604  |
| Haloarculaceae.1 | WSH3.gz_assembly | 77.7218 | 250 | 953  |
| PCN9.gz_assembly | WSA2.gz_assembly | 77.7903 | 357 | 981  |
| Haloferacaceae.1 | Haloferacaceae.2 | 77.7996 | 147 | 713  |
| Haloferacaceae.2 | Haloferacaceae.1 | 77.8223 | 144 | 416  |
| Haloarculaceae.5 | WSH3.gz_assembly | 77.9163 | 272 | 824  |
| WSA2.gz_assembly | PCN9.gz_assembly | 77.93   | 348 | 1248 |
| Haloarculaceae.1 | Haloarculaceae.5 | 78.4522 | 267 | 953  |
| Haloarculaceae.5 | Haloarculaceae.1 | 78.6182 | 271 | 824  |
| Halovenus        | WSH3.gz_assembly | 79.7953 | 340 | 605  |
| WSH3.gz_assembly | Halovenus        | 79.933  | 331 | 1077 |
| Halovenus        | Haloarculaceae.3 | 81.4079 | 105 | 605  |
| Haloarculaceae.3 | Halovenus        | 81.5705 | 111 | 604  |
| Haloarculaceae.5 | Haloarculaceae.2 | 85.8727 | 359 | 824  |
| Haloarculaceae.2 | Haloarculaceae.5 | 85.9246 | 370 | 663  |

Table S6

| Gene ID                 | Gene        | Best BLAST Hit                                                         | Acession #     | % ID  | E-value   |
|-------------------------|-------------|------------------------------------------------------------------------|----------------|-------|-----------|
| <b>12B.1 Metagenome</b> |             |                                                                        |                |       |           |
| c_000000339582_1        | <i>nifD</i> | <i>Chloroflexaceae bacterium</i> (stromatolite metagenome)             | NJN65560.1     | 56.36 | 1.00E-138 |
| c_000000029304_3        | <i>nifD</i> | <i>Chloroflexaceae bacterium</i> (stromatolite metagenome)             | NJN65560.1     | 57.2  | 3.00E-100 |
| c_000000286385_1        | <i>nifD</i> | <i>Chloroflexaceae bacterium</i> (stromatolite metagenome)             | NJN65560.1     | 55.86 | 2.00E-129 |
| c_000000146019_1        | <i>nifH</i> | <i>Halorhodospira halochloris</i>                                      | BAU57913.1     | 84.11 | 5.00E-89  |
| c_000000150855_1        | <i>nifH</i> | <i>Roseiflexus sp. RS-1</i>                                            | WP_011955961.1 | 75.68 | 3.00E-99  |
| c_000000412048_2        | <i>nifH</i> | <i>Roseiflexus castenholzii</i>                                        | WP_012122497.1 | 70.09 | 4.00E-44  |
| c_000000419371_3        | <i>nifH</i> | <i>Roseiflexus sp. RS-1</i>                                            | WP_011955961.1 | 72.69 | 2.00E-142 |
| c_000000029304_2        | <i>nifK</i> | archaeon BMS3Bbin16                                                    | GBE57063.1     | 54.3  | 0         |
| c_000000266741_1        | <i>nifK</i> | archaeon BMS3Abin16                                                    | GBE18617.1     | 56.92 | 8.00E-50  |
| c_000000348638_1        | <i>nifK</i> | archaeon BMS3Abin16                                                    | GBE18617.1     | 54.92 | 1.00E-40  |
| c_000000476483_1        | <i>nifK</i> | archaeon BMS3Bbin16                                                    | GBE57063.1     | 56.07 | 2.00E-32  |
| <b>67B.1 Metagenome</b> |             |                                                                        |                |       |           |
| c_000000142325_1        | <i>nifD</i> | <i>Rhodovibrio salinarum</i>                                           | WP_027289759.1 | 90.7  | 1.00E-47  |
| <b>12B.2 Metagenome</b> |             |                                                                        |                |       |           |
| c_000000324579_1        | <i>nifD</i> | <i>Rhodovibrio salinarum</i>                                           | WP_027289759.1 | 84.58 | 0.00E+00  |
| c_000000324579_2        | <i>nifH</i> | <i>Rhodoplanes serenus</i>                                             | WP_155481001.1 | 81.82 | 1.00E-16  |
| c_000000210854_1        | <i>nifH</i> | <i>Rhodovibrio salinarum</i>                                           | WP_027289758.1 | 90.87 | 1.00E-154 |
| c_000000219157_1        | <i>nifK</i> | <i>Rhodovibrio salinarum</i>                                           | WP_027289760.1 | 83.64 | 7.00E-134 |
| <b>33.2 Metagenome</b>  |             |                                                                        |                |       |           |
| c_000000151043_1        | <i>nifD</i> | <i>Deltaproteobacteria bacterium</i> (wastewater metagenome)           | NCC26223.1     | 78    | 3.00E-143 |
| c_000000156957_1        | <i>nifD</i> | <i>Desulfovibrio brasiliensis</i>                                      | WP_054649226.1 | 78.31 | 4.00E-38  |
| c_000000055755_1        | <i>nifH</i> | <i>Desulfobulbus sp. Tol-SR</i>                                        | KGO35492.1     | 88.89 | 3.00E-49  |
| c_000000074817_2        | <i>nifH</i> | <i>Deltaproteobacteria bacterium</i> (wastewater metagenome)           | NCC25938.1     | 82.78 | 2.00E-170 |
| c_000000066890_1        | <i>nifK</i> | <i>Desulfovibrio gilchinskyi</i>                                       | WP_085099001.1 | 78.9  | 1.00E-59  |
| c_000000105010_1        | <i>nifK</i> | <i>Desulfocurvus vexinensis</i>                                        | WP_028586618.1 | 82.76 | 2.00E-49  |
| <b>35.2 Metagenome</b>  |             |                                                                        |                |       |           |
| c_000000163780_1        | <i>nifD</i> | Candidatus <i>Electrothrix aarhusiensis</i> ( <i>Desulfbulbaceae</i> ) | RWX47654.1     | 71.17 | 9.00E-85  |
| c_000000144626_1        | <i>nifD</i> | <i>Rhodovibrio salinarum</i>                                           | WP_027289759.1 | 83.33 | 2.00E-96  |
| c_000000242108_1        | <i>nifK</i> | <i>Halorhodospira halophila</i>                                        | WP_011813089.1 | 76.42 | 2.00E-53  |

Table S7

| Gene ID                 | Gene Name | Best BLAST Hit                                                                       | Accession #    | % ID   | E-value   |
|-------------------------|-----------|--------------------------------------------------------------------------------------|----------------|--------|-----------|
| <b>12B.2 Metagenome</b> |           |                                                                                      |                |        |           |
| c_00000000782_2         | dsrA      | uncultured Desulfohalobiaceae bacterium (MgCl <sub>2</sub> -containing environments) | ABD38984.1     | 87.805 | 2.23E-20  |
| c_00000000782_1         | dsrB      | Desulfovermiculus halophilus                                                         | WP_027370030.1 | 81.05  | 0         |
| c_000000307376_1        | dsrB      | Desulfovermiculus halophilus                                                         | WP_027370031.1 | 79.487 | 1.72E-113 |
| <b>67B.2 Metagenome</b> |           |                                                                                      |                |        |           |
| c_000000052251_1        | dsrA      | uncultured sulfate-reducing bacterium (Mediterranean solar saltern)                  | ACM45532.1     | 95.489 | 4.30E-89  |
| c_000000096034_1        | dsrA      | Betaproteobacteria bacterium (groundwater environment)                               | MBI3042764.1   | 61.224 | 8.99E-34  |
| c_000000263801_1        | dsrA      | uncultured sulfate-reducing bacterium (Mediterranean solar saltern)                  | ACM45532.1     | 91.71  | 3.68E-128 |
| c_000000328055_1        | dsrA      | Desulfovermiculus halophilus                                                         | WP_027370030.1 | 84.516 | 5.50E-80  |
| c_000000431746_4        | dsrA      | uncultured Desulfohalobiaceae bacterium (MgCl <sub>2</sub> -containing environments) | ABD38987.1     | 98     | 1.04E-25  |
| c_000000552184_1        | dsrA      | Desulfovermiculus halophilus                                                         | WP_027370030.1 | 83.133 | 4.03E-144 |
| c_000000263801_2        | dsrB      | Desulfovermiculus halophilus                                                         | WP_027370031.1 | 82.544 | 0         |
| c_000000423115_1        | dsrB      | Gammaproteobacteria bacterium HGW-Gammaproteobacteria-1 (groundwater metagenome)     | PKM45266.1     | 78.431 | 4.51E-55  |
| c_000000431746_3        | dsrB      | Desulfovermiculus halophilus                                                         | WP_027370031.1 | 84.557 | 0         |
| c_000000652016_2        | dsrB      | Candidatus Reidiella endopervernicosa                                                | WP_078483318.1 | 74.638 | 5.54E-71  |
| <b>29.2 Metagenome</b>  |           |                                                                                      |                |        |           |
| c_000000349271_2        | dsrA      | Desulfovermiculus halophilus                                                         | WP_027370030.1 | 81.507 | 0         |
| c_000000158655_1        | dsrB      | Desulfovermiculus halophilus                                                         | WP_027370031.1 | 78.824 | 6.07E-42  |
| c_000000349271_1        | dsrB      | Desulfovermiculus halophilus                                                         | WP_027370031.1 | 83.578 | 0         |
| <b>33.2 Metagenome</b>  |           |                                                                                      |                |        |           |
| c_000000095341_6        | dsrA      | Desulfovermiculus halophilus                                                         | WP_027370030.1 | 81.735 | 0         |
| c_000000115348_1        | dsrA      | uncultured sulfate-reducing bacterium (Mediterranean solar saltern)                  | ACM45532.1     | 98.013 | 1.01E-103 |
| c_000000154383_1        | dsrA      | Desulfovermiculus halophilus                                                         | WP_027370030.1 | 84.131 | 0         |
| c_000000440998_1        | dsrA      | uncultured sulfate-reducing bacterium (Mediterranean solar saltern)                  | ACM45532.1     | 94.841 | 7.52E-179 |
| c_000000470085_1        | dsrA      | Desulfovermiculus halophilus                                                         | WP_027370030.1 | 83.784 | 2.90E-75  |
| c_000000095341_7        | dsrB      | Desulfovermiculus halophilus                                                         | WP_027370031.1 | 82.544 | 0         |
| c_000000099172_1        | dsrB      | Desulfovibrionales bacterium (anaerobic digester metagenome)                         | NLW80111.1     | 84.706 | 1.53E-50  |
| c_000000115348_2        | dsrB      | uncultured sulfate-reducing bacterium (Mediterranean solar saltern)                  | ACM45533.1     | 94.924 | 2.14E-142 |
| c_000000138427_1        | dsrB      | Desulfovermiculus halophilus                                                         | WP_027370031.1 | 83.465 | 2.03E-73  |
| c_000000182614_1        | dsrB      | Desulfovermiculus halophilus                                                         | WP_027370031.1 | 84.255 | 1.03E-150 |
| <b>35.1 Metagenome</b>  |           |                                                                                      |                |        |           |
| c_000000234629_1        | dsrA      | Halorhodospira halophila                                                             | WP_201171943.1 | 90.323 | 0         |
| c_000000667957_1        | dsrA      | Thiobacillus denitrificans                                                           | WP_011311881.1 | 70.27  | 1.11E-29  |
| c_000000698539_6        | dsrA      | Desulfovermiculus halophilus                                                         | WP_027370030.1 | 81.735 | 0         |
| c_000000698539_5        | dsrB      | Desulfovermiculus halophilus                                                         | WP_027370031.1 | 82.045 | 0         |
| <b>35.2 Metagenome</b>  |           |                                                                                      |                |        |           |
| c_000000146673_4        | dsrA      | uncultured sulfate-reducing bacterium (Mediterranean solar saltern)                  | ACM45532.1     | 93.214 | 0         |
| c_000000196400_16       | dsrA      | Desulfovermiculus halophilus                                                         | WP_027370030.1 | 81.34  | 1.94E-113 |
| c_000000146673_3        | dsrB      | Desulfovermiculus halophilus                                                         | WP_027370031.1 | 82.294 | 0         |
| c_000000507418_1        | dsrB      | uncultured sulfate-reducing bacterium (Mediterranean solar saltern)                  | ACM45525.1     | 94.624 | 1.53E-129 |
| <b>35.3 Metagenome</b>  |           |                                                                                      |                |        |           |
| c_000000154008_1        | dsrA      | Desulfovermiculus halophilus                                                         | WP_027370030.1 | 82.609 | 3.86E-146 |
| c_000000154017_1        | dsrA      | Desulfovermiculus halophilus                                                         | WP_027370030.1 | 86.611 | 7.69E-144 |
| c_000000699647_1        | dsrA      | uncultured sulfate-reducing bacterium (Mediterranean solar saltern)                  | ACM45524.1     | 93.798 | 6.79E-83  |
| c_000000614952_1        | dsrB      | uncultured sulfate-reducing bacterium (Mediterranean solar saltern)                  | ACM45543.1     | 85.143 | 2.36E-110 |
| c_000000743744_3        | dsrB      | Desulfovermiculus halophilus                                                         | WP_027370031.1 | 83.399 | 6.52E-160 |
| <b>56.2 Metagenome</b>  |           |                                                                                      |                |        |           |
| c_000000223435_2        | dsrA      | Desulfohalobium retbaense                                                            | WP_015750705.1 | 80.899 | 6.03E-90  |
| c_000000481738_1        | dsrA      | uncultured sulfate-reducing bacterium (Mediterranean solar saltern)                  | ACM45532.1     | 90.526 | 1.36E-55  |
| c_000000296478_1        | dsrB      | Desulfovibrio sp. (anaerobic digester metagenome)                                    | NMC50171.1     | 82     | 5.35E-58  |
| c_000000481738_2        | dsrB      | uncultured sulfate-reducing bacterium (Mediterranean solar saltern)                  | ACM45535.1     | 86.512 | 1.81E-142 |
| <b>56.3 Metagenome</b>  |           |                                                                                      |                |        |           |
| c_000000266214_1        | dsrA      | Desulfonatronovibrio magnus                                                          | WP_045212625.1 | 82.639 | 5.23E-68  |
| c_000000310384_1        | dsrA      | uncultured sulfate-reducing bacterium (Mediterranean solar saltern)                  | ACM45532.1     | 90     | 6.89E-73  |
| c_000000083255_1        | dsrB      | Candidatus Reidiella endopervernicosa                                                | WP_078483318.1 | 75     | 8.36E-34  |
| c_000000129612_1        | dsrB      | Sulfurifustis variabilis                                                             | WP_096457663.1 | 77.348 | 2.88E-103 |
| c_000000310384_2        | dsrB      | uncultured sulfate-reducing bacterium (Mediterranean solar saltern)                  | ACM45533.1     | 89.706 | 1.46E-41  |
| <b>46.2 Metagenome</b>  |           |                                                                                      |                |        |           |
| c_000000109617_1        | dsrA      | uncultured prokaryote (GSL sediments)                                                | ABD46878.1     | 94.958 | 8.99E-78  |
| c_000000109642_9        | dsrA      | Desulfovermiculus halophilus                                                         | WP_027370030.1 | 81.579 | 3.78E-154 |
| c_000000123025_2        | dsrA      | Desulfomicrobium norvegicum                                                          | WP_092194128.1 | 74.576 | 2.38E-23  |
| c_000000169346_1        | dsrA      | Gammaproteobacteria bacterium (hydrothermal sediment)                                | RKZ39678.1     | 72.678 | 8.41E-96  |
| c_000000196300_1        | dsrA      | uncultured sulfate-reducing bacterium (Mediterranean solar saltern)                  | ACM45532.1     | 97.143 | 1.23E-94  |
| c_000000206341_1        | dsrA      | Desulfonatronovibrio magnus                                                          | WP_045212625.1 | 83.333 | 6.74E-35  |
| c_000000225585_8        | dsrA      | uncultured sulfate-reducing bacterium (Mediterranean solar saltern)                  | ACM45532.1     | 91.365 | 0         |
| c_000000388521_2        | dsrA      | uncultured sulfate-reducing bacterium (Mediterranean solar saltern)                  | ACM45532.1     | 95.652 | 4.07E-39  |
| c_000000388564_2        | dsrA      | Desulfovermiculus halophilus                                                         | WP_027370030.1 | 82.877 | 0         |
| c_000000442685_1        | dsrA      | uncultured sulfate-reducing bacterium (Mediterranean solar saltern)                  | ACM45532.1     | 99.057 | 2.05E-70  |
| c_000000483844_2        | dsrA      | uncultured microorganism (hydrothermal fluid)                                        | AJA06229.1     | 62.903 | 2.71E-20  |
| c_000000537023_1        | dsrA      | Archaeoglobaceae archaeon (Mid-Cayman Rise Vent Fluids)                              | HID42311.1     | 68.77  | 6.00E-168 |
| c_000000544283_1        | dsrA      | uncultured prokaryote (GSL sediments)                                                | ABD46878.1     | 93.45  | 3.67E-161 |
| c_000000544595_1        | dsrA      | uncultured prokaryote (GSL sediments)                                                | ABD46870.1     | 93.023 | 2.23E-81  |
| c_000000655084_1        | dsrA      | uncultured prokaryote (GSL sediments)                                                | ABD46878.1     | 91.818 | 6.03E-69  |
| c_00000069099_1         | dsrB      | Archaeoglobus sp. (hot spring sediment)                                              | HGQ78171.1     | 76.033 | 5.44E-63  |
| c_000000122840_1        | dsrB      | Betaproteobacteria bacterium (soil metagenome)                                       | HAN56732.1     | 75.806 | 3.70E-26  |
| c_000000225585_7        | dsrB      | Desulfovermiculus halophilus                                                         | WP_027370031.1 | 82.544 | 0         |
| c_000000276611_1        | dsrB      | Magnetococcus bacterium (lake sediments)                                             | MBF0613955.1   | 73.786 | 2.98E-48  |
| c_000000312408_3        | dsrB      | Desulfobacteraceae bacterium SEEP-SAG9 (marine sediment)                             | PQP34394.1     | 87.273 | 5.54E-31  |
| c_000000388521_1        | dsrB      | uncultured sulfate-reducing bacterium (Mediterranean solar saltern)                  | ACM45525.1     | 94.286 | 6.10E-96  |
| c_000000388564_1        | dsrB      | uncultured sulfate-reducing bacterium (Mediterranean solar saltern)                  | ACM45533.1     | 95     | 4.59E-96  |
| c_000000483844_1        | dsrB      | uncultured microorganism (hydrothermal fluid)                                        | AJA06230.1     | 61.224 | 2.29E-64  |
| c_000000539054_3        | dsrB      | Desulfovermiculus halophilus                                                         | WP_027370031.1 | 86.093 | 0         |

|                  |             |                                   |                |        |          |
|------------------|-------------|-----------------------------------|----------------|--------|----------|
| c_000000545959_1 | <i>dsrB</i> | Desulfovibrio ferrophilus         | WP_126380811.1 | 84.685 | 6.96E-65 |
| c_000000658443_1 | <i>dsrB</i> | Desulfohalophilus alkaliarsenatis | AFJ04155.1     | 88.462 | 3.42E-63 |
